# Supplementary material
Source: PubMed Central journal article supplement (PMC1500853)

Figure S1  
Fang et al.

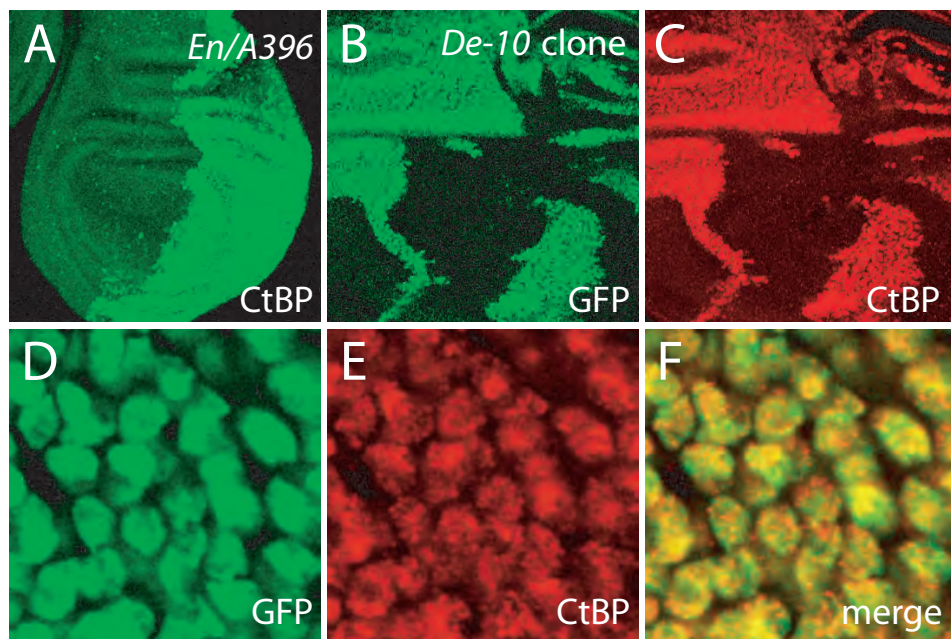

Supplement: 7601153s1.pdf [file 7601153s1.pdf]
